# Supplementary material for: Redox Mechanism of Azathioprine and Its Interaction with DNA
Source: MDPI journal article supplement (doi:10.3390/ijms22136805), 2021-06-24
Supplement: s1 [file s1]

## Supplementary information

### Redox mechanism of azathioprine and its interaction with DNA

Mihaela-Cristina Bunea<sup>1,2</sup>, Victor-Constantin Diculescu<sup>1</sup>, Monica Enculescu<sup>1</sup>, Horia Iovu<sup>2</sup> and Teodor Adrian Enache<sup>1\*</sup>

<sup>1</sup>National Institute of Materials Physics, Atomistilor 405A, 077125, Magurele Romania

<sup>2</sup>University Politehnica of Bucharest, Advanced Polymer Materials Group, 1-7 Gh. Polizu Str. Bucharest 011061, Romania

\*Corresponding authors: [adrian.enache@infim.ro](mailto:adrian.enache@infim.ro)

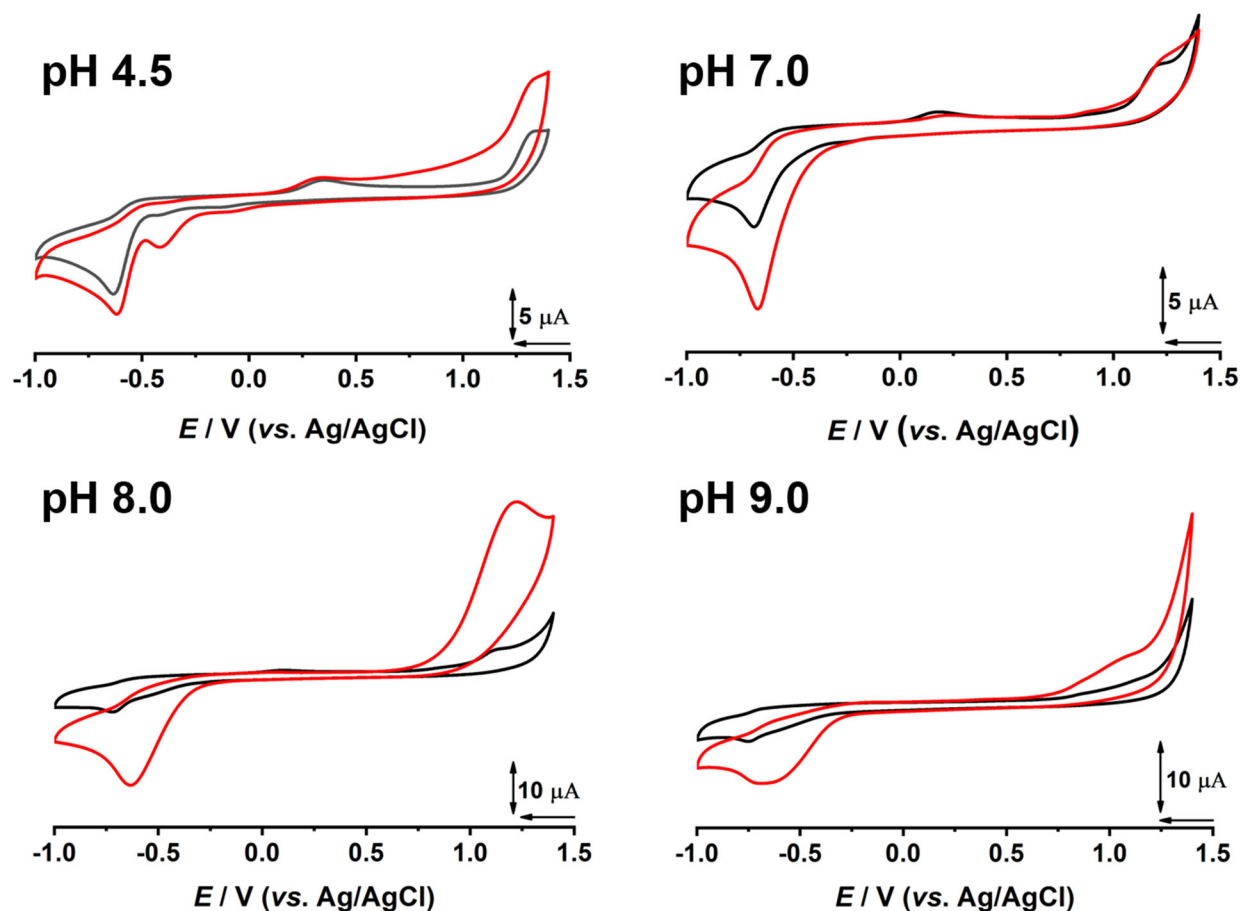

**Figure S1.** Cyclic voltammograms recorded for (—) normal O<sub>2</sub> content and (—) O<sub>2</sub> bubbled solutions of 500 μM AZA in 0.1 M buffer with different pHs;  $\nu = 100 \text{ mVs}^{-1}$ .

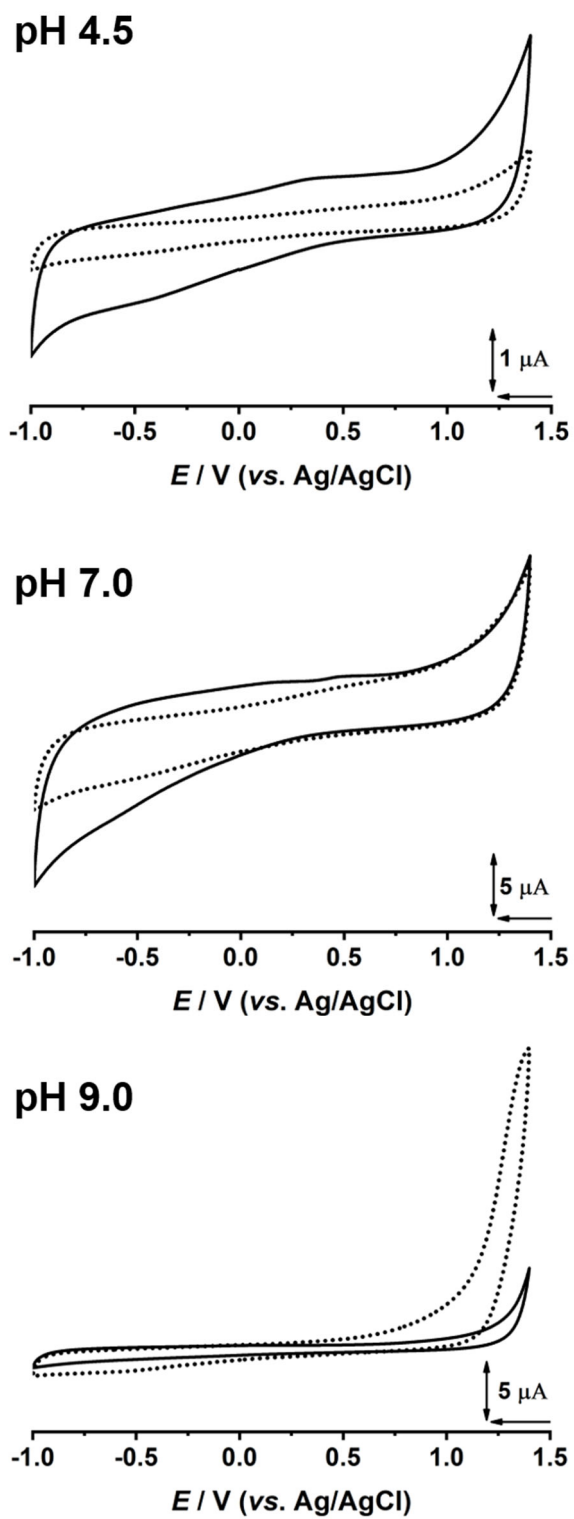

**Figure S2.** Cyclic voltammogram recorded at glassy carbon electrode in (—) different pHs and (•••) 0.9 mM DMSO

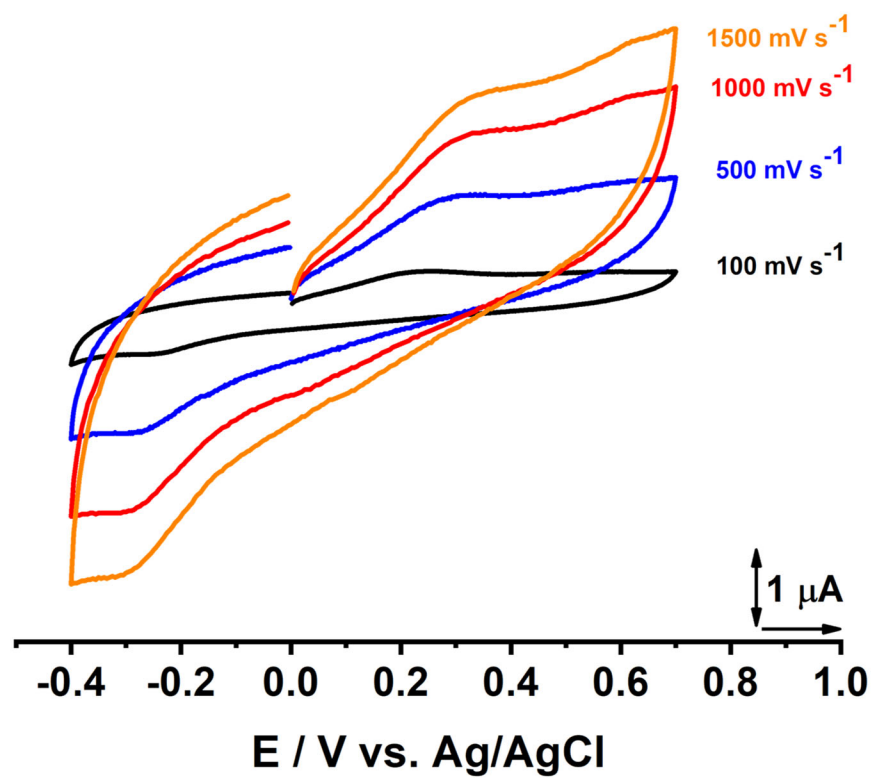

**Figure.S3.** Cyclic voltammogram recorded in 500  $\mu\text{M}$  AZA after applied potential 10 min from  $E_0 = 0 \text{ V}$ ,  $E_{\text{min}} = -0.4 \text{ V}$ ,  $E_{\text{max}} = 0.7 \text{ V} (-0.6 \text{ V})$

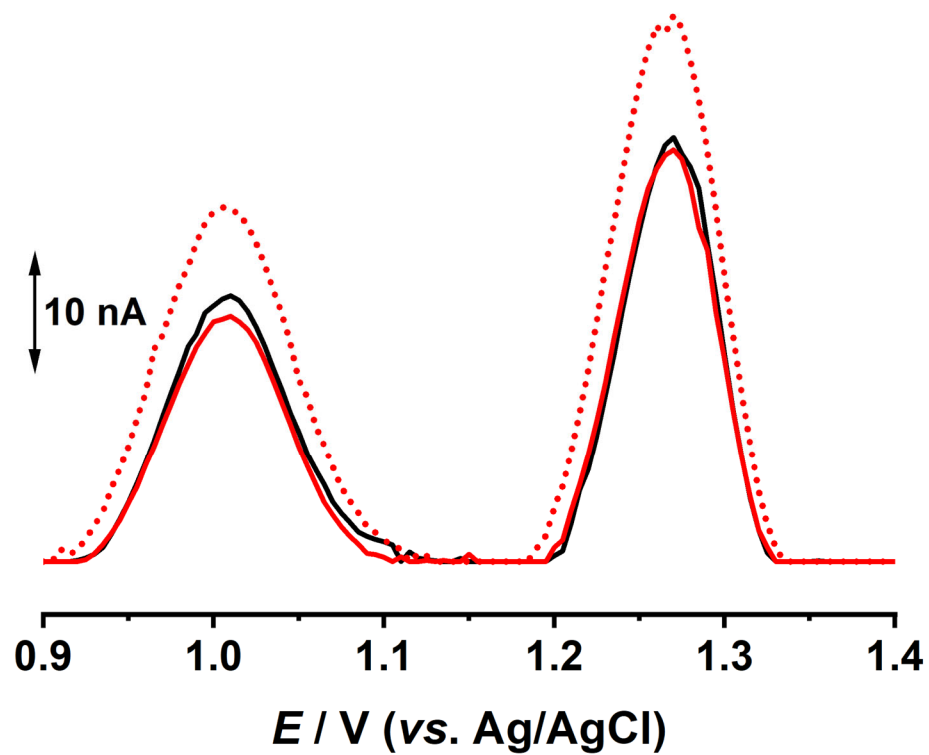

**Figure.S4.** DP voltammograms recorded for (—) DNA biosensor without applied potential, (—) DNA biosensor incubated in AZA (10 min) without applied potential and (•••) DNA biosensor incubated in AZA (10 min) with applied potential.

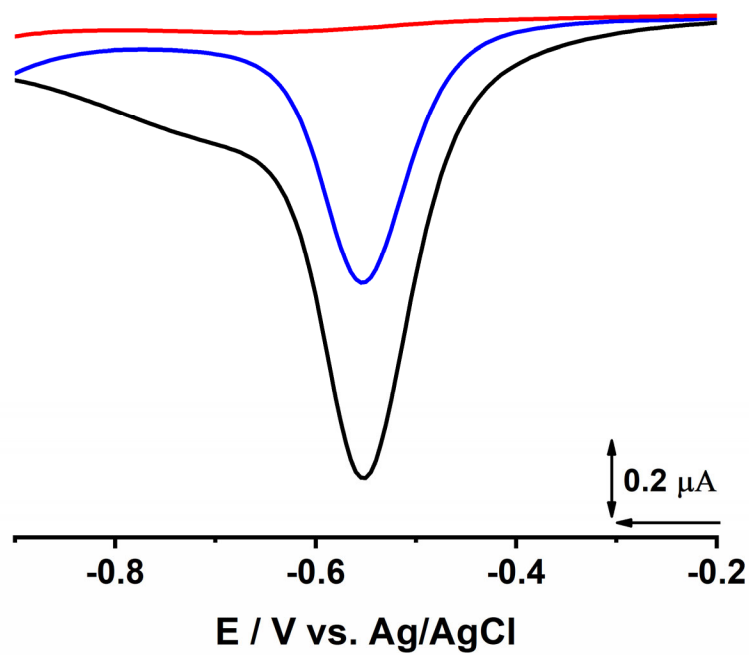

**Figure S5.** DP voltammograms recorded in acetate buffer pH 4.5 for DNA biosensor incubated with AZA for (—) 10 min without applied potential, (—) 10 min with applied potential and (—) 20 min with applied potential.
